# Supplementary material
Source: PubMed Central journal article supplement (PMC8341768)
Supplement: NIHMS1719051-supplement-Supplementary.pdf [file NIHMS1719051-supplement-Supplementary.pdf]

**Supplementary Figure. Non-essential business closures applying to vape shops in five states**

| State*        | March |    |    | April |    |    |    | May |    |    |    | June |   |    |
|---------------|-------|----|----|-------|----|----|----|-----|----|----|----|------|---|----|
|               | 16    | 23 | 30 | 6     | 13 | 20 | 27 | 4   | 11 | 18 | 25 | 1    | 8 | 15 |
| California    |       |    |    |       |    |    |    |     |    |    |    |      |   |    |
| Massachusetts |       |    |    |       |    |    |    |     |    |    |    |      |   |    |
| Minnesota     |       |    |    |       |    |    |    |     |    |    |    |      |   |    |
| Oklahoma **   |       |    |    |       |    |    |    |     |    |    |    |      |   |    |
| Washington    |       |    |    |       |    |    |    |     |    |    |    |      |   |    |

Note: CA: 3/19-5/7; MA: 3/24-6/8; MN: 3/27-5/17; OK: 3/25-4/1\*; WA: 3/25-5/31.

\* GA: n/a.

\* In OK, vape shops were deemed essential businesses as of April 1.
